# Supplementary material
Source: publisher figshare collection journal article supplement (https://tandf.figshare.com/ndownloader/files/14479376)
Supplement: Supplementary file 1 [file 14479376]

# **SUPPLEMENTAL DATA**

## **Liposomes with asymmetric bilayers produced from inverse emulsions for nucleic acid delivery**

**Maria B. C. de Matos<sup>1</sup>, Bárbara S. Miranda<sup>2</sup>, Yudha Rizky Nuari<sup>1</sup>, Gert Storm<sup>1</sup>, Gero Leneweit<sup>2</sup>, Raymond M. Schiffelers<sup>3</sup> and Robbert J. Kok<sup>1\*</sup>**

<sup>1</sup>Department of Pharmaceutics, Utrecht Institute for Pharmaceutical Sciences, Utrecht University, universiteitsweg 99, 3584 CG, Utrecht, The Netherlands

<sup>2</sup>ABNOBA GmbH, Pforzheim, Germany

<sup>3</sup>Laboratory Clinical Chemistry & Haematology, University Medical Center Utrecht, Utrecht, The Netherlands

Corresponding author: [r.j.kok@uu.nl](mailto:r.j.kok@uu.nl)

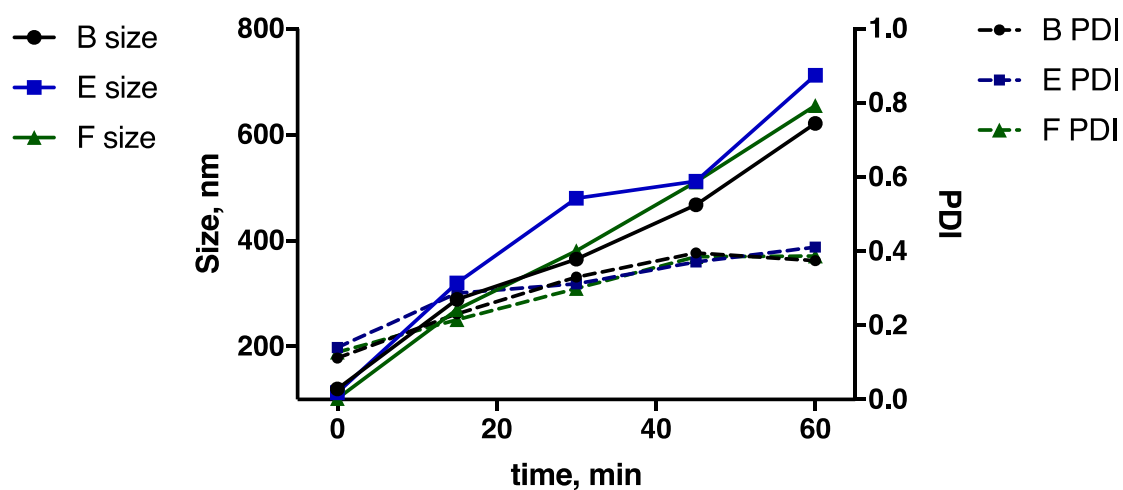

**Supplemental Figure 1.** Stability of hand-extrusion nanoemulsions. Stability of nanoemulsions was measured during 60 min after preparation by hand-extrusion method as described in the main manuscript. Size and polydispersity were determined by DLS. Full lines: mean diameter (left axis); dashed lines: polydispersity index (right axis). Black: formulation B; Blue: formulation E; Green: formulation F.
